# Supplementary material for: A multifunctional biodegradable brush polymer-drug conjugate for paclitaxel/gemcitabine co-delivery and tumor imaging
Source: Royal Society of Chemistry journal article supplement (doi:10.1039/c9na00282k), 2019-01-01
Supplement: c9na00282k1.pdf [file c9na00282k1.pdf]

Electronic Supplementary Information (ESI)

**A multifunctional biodegradable brush polymer-drug conjugate for paclitaxel/gemcitabine co-delivery and tumor imaging**

Haotian Sun,<sup>a</sup> Lingyue Yan,<sup>b</sup> Michael Yu Zarng Chang,<sup>b</sup> Kevin A. Carter,<sup>b</sup> Runsheng Zhang,<sup>a</sup> Leigh Slyker,<sup>a</sup> Jonathan F. Lovell,<sup>b</sup> Yun Wu,<sup>\*b</sup> and Chong Cheng<sup>\*a</sup>

<sup>a</sup> Department of Chemical and Biological Engineering, University at Buffalo, The State University of New York, Buffalo, New York 14260, USA.

<sup>b</sup> Department of Biomedical Engineering, University at Buffalo, The State University of New York, Buffalo, New York 14260, USA.

\* Authors to whom correspondence should be addressed:

E-mail addresses: ccheng8@buffalo.edu (C. Cheng); ywu32@buffalo.edu (Y. Wu)

## Supporting Figures

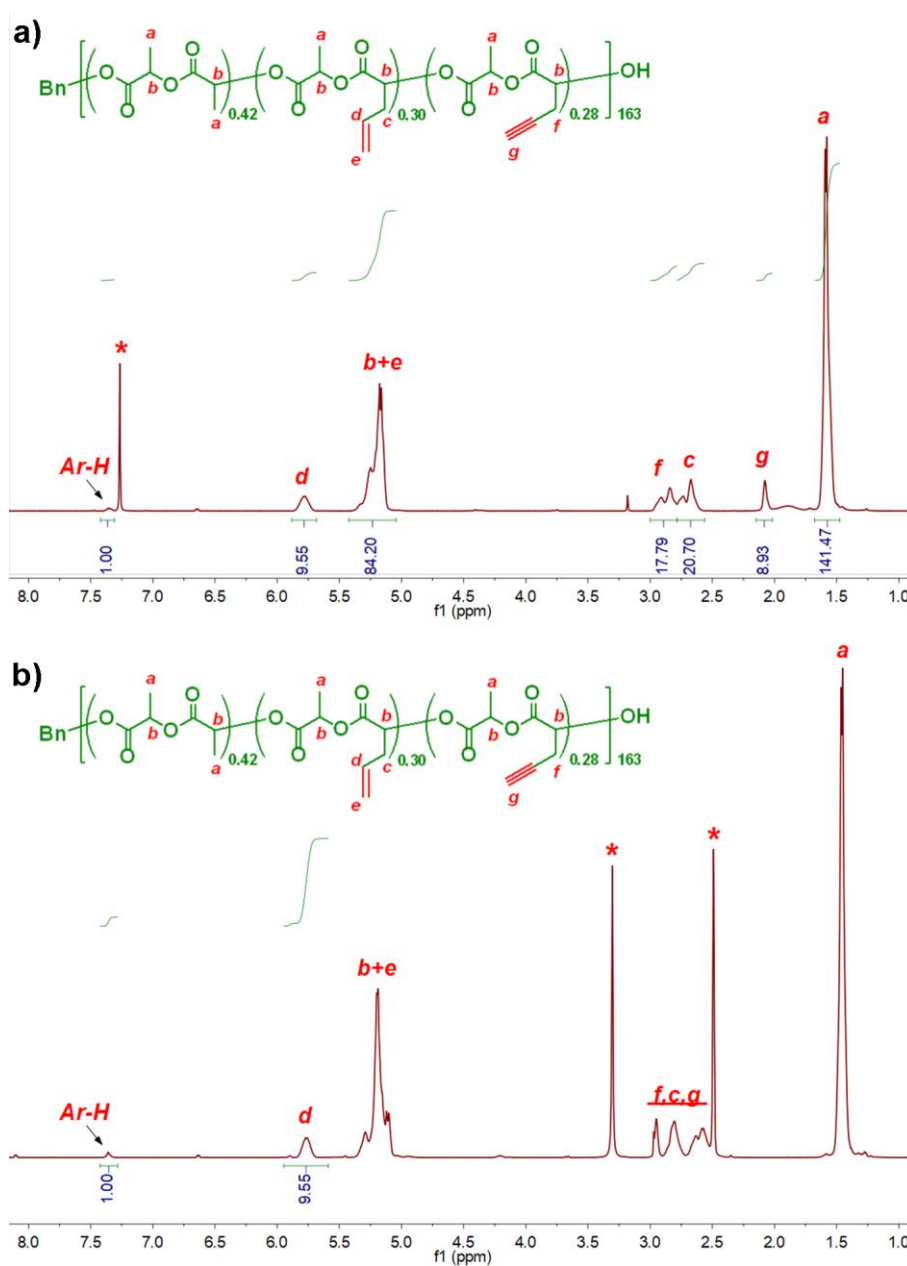

**Fig. S1**  $^1\text{H}$  NMR spectra of acetylenyl/allyl-functionalized **1**: a) in  $\text{CDCl}_3$ , b) in  $\text{DMSO}-d_6$ .

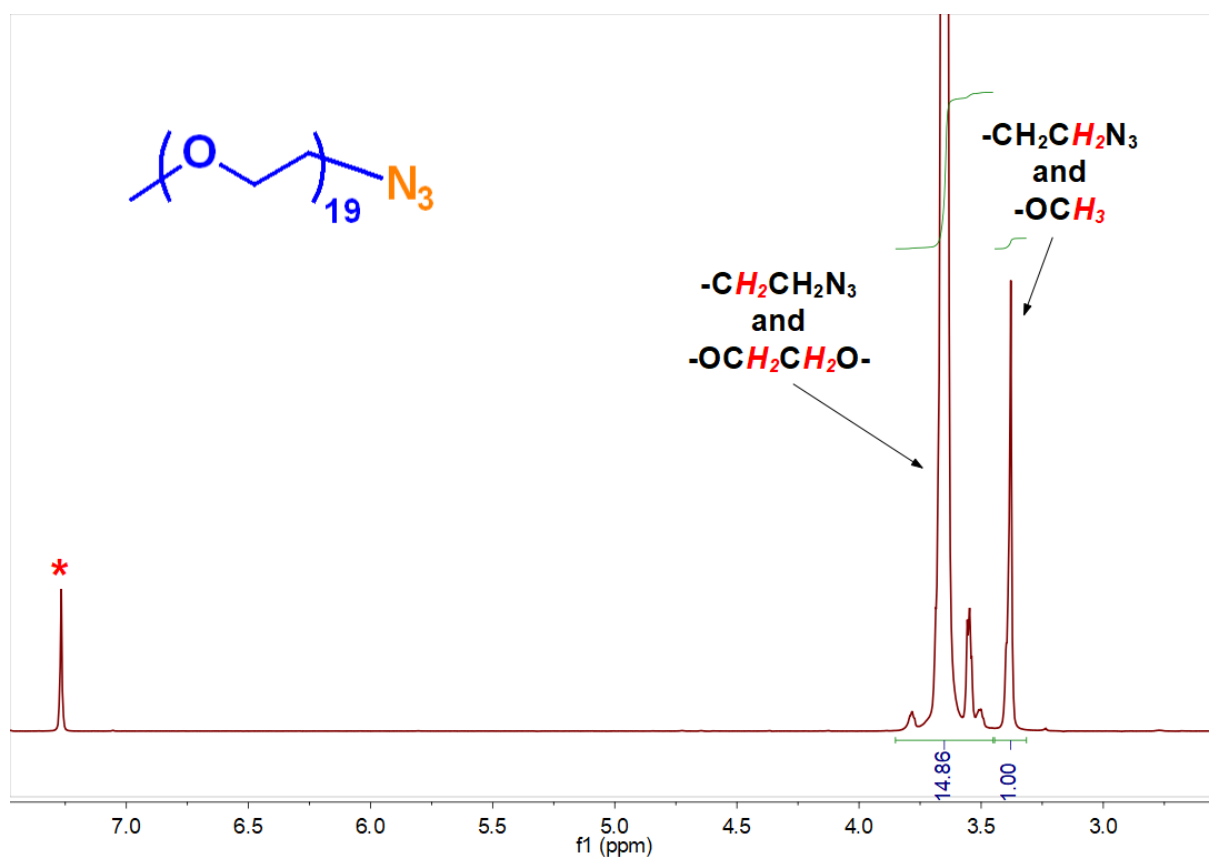

**Fig. S2**  $^1\text{H}$  NMR spectra of  $\text{CH}_3\text{O-PEG-N}_3$  in  $\text{CDCl}_3$ .

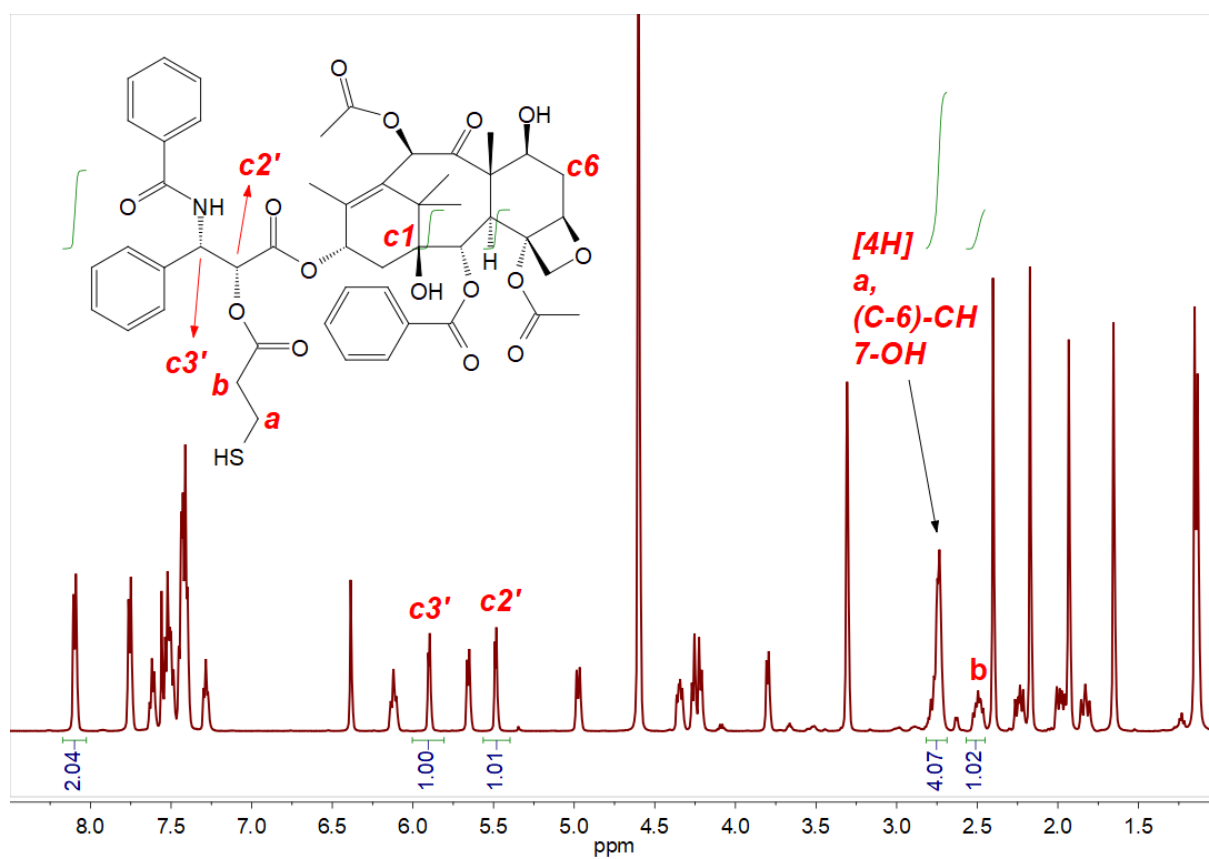

**Fig. S3**  $^1\text{H}$  NMR spectrum of PTX-SH in  $\text{CDCl}_3/\text{CD}_3\text{OD}$  (v/v, 1:1).

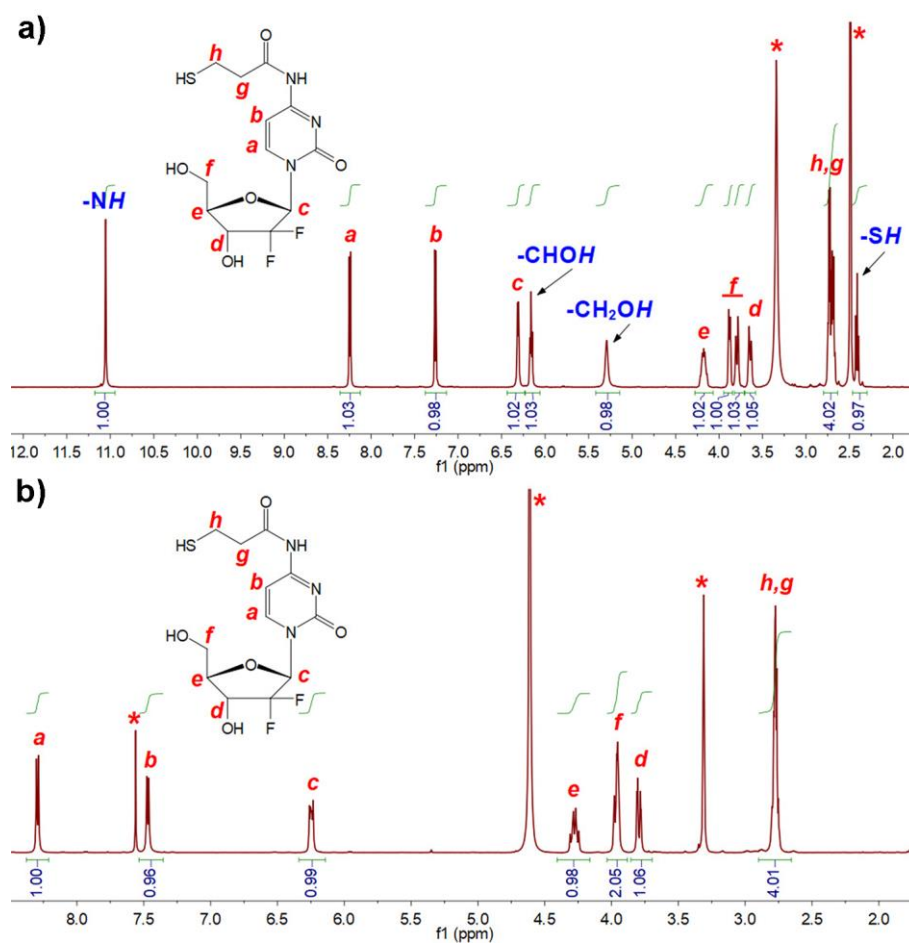

**Fig. S4**  $^1\text{H}$  NMR spectra of GEM-SH in a)  $\text{DMSO}-d_6$ , b)  $\text{CDCl}_3/\text{CD}_3\text{OD}$  (v/v, 1:1).

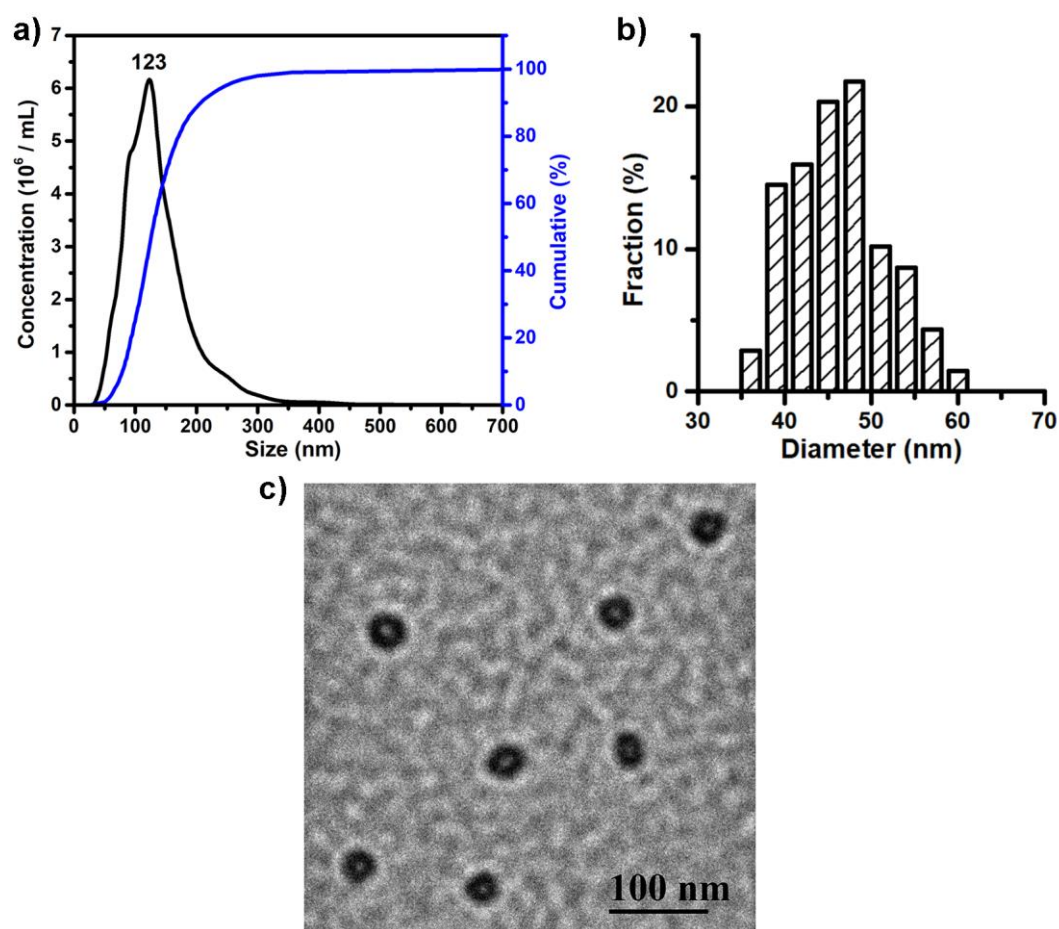

**Fig. S5** a) Size distribution profile of BP 2 in H<sub>2</sub>O based on NTA measurements. b) Histogram of diameter distribution of BP 2 according to the TEM images. c) TEM images of BP 2. TEM samples were stained by RuO<sub>4</sub>.

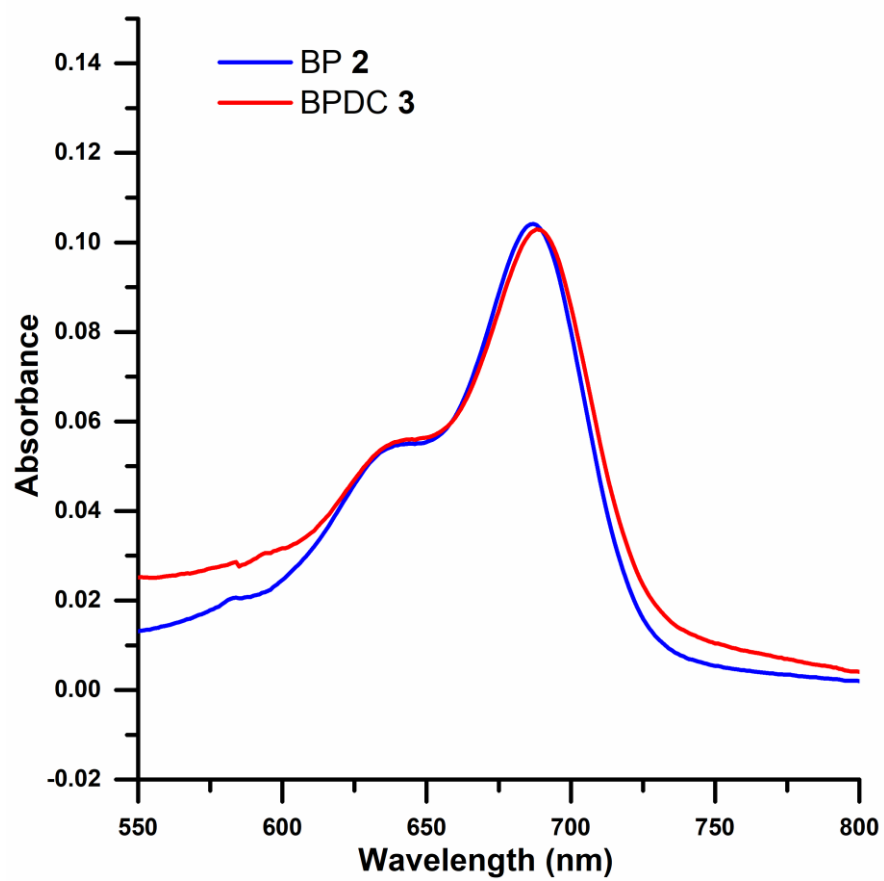

**Fig. S6** Absorbance spectra of BP 2 and BPDC 3.

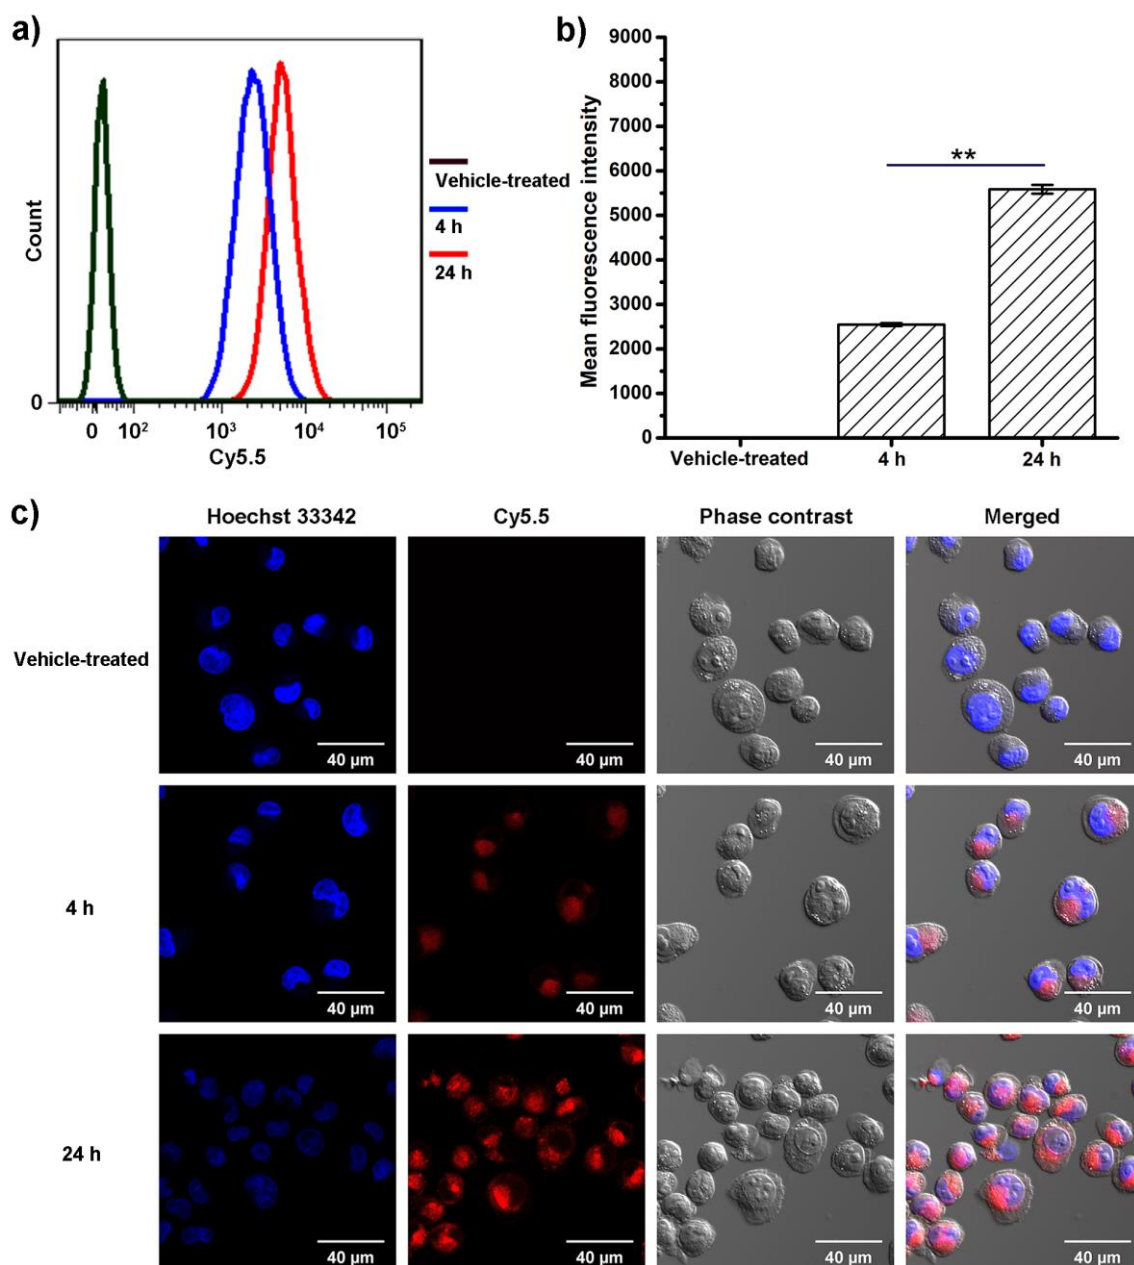

**Fig. S7** a) Flow cytometry data showing cellular uptake of BP **2** in MIA PaCa-2 cells at 4 and 24 h post treatment compared with untreated cells. b) Mean fluorescence intensity of Cy5.5 obtained from flow cytometry at 4 and 24 h post treatment. c) Confocal microscopy images of MIA PaCa-2 cells at 4 and 24 h post treatment with BP **2**, compared with untreated cells. Cell nuclei were counterstained with Hoechst 33342. Data were reported as mean  $\pm$  standard deviation (SD) of three independent experiments. One-way ANOVA was used to assess the statistical significance of the data.  $**p < .01$  was considered as statistical highly significant.
